# Supplementary material for: Four newly synthesized enones induce mitochondrial-mediated apoptosis and G2/M cell cycle arrest in colorectal and cervical cancer cells
Source: Royal Society of Chemistry journal article supplement (doi:10.1039/d4ra06529h), 2024-01-01

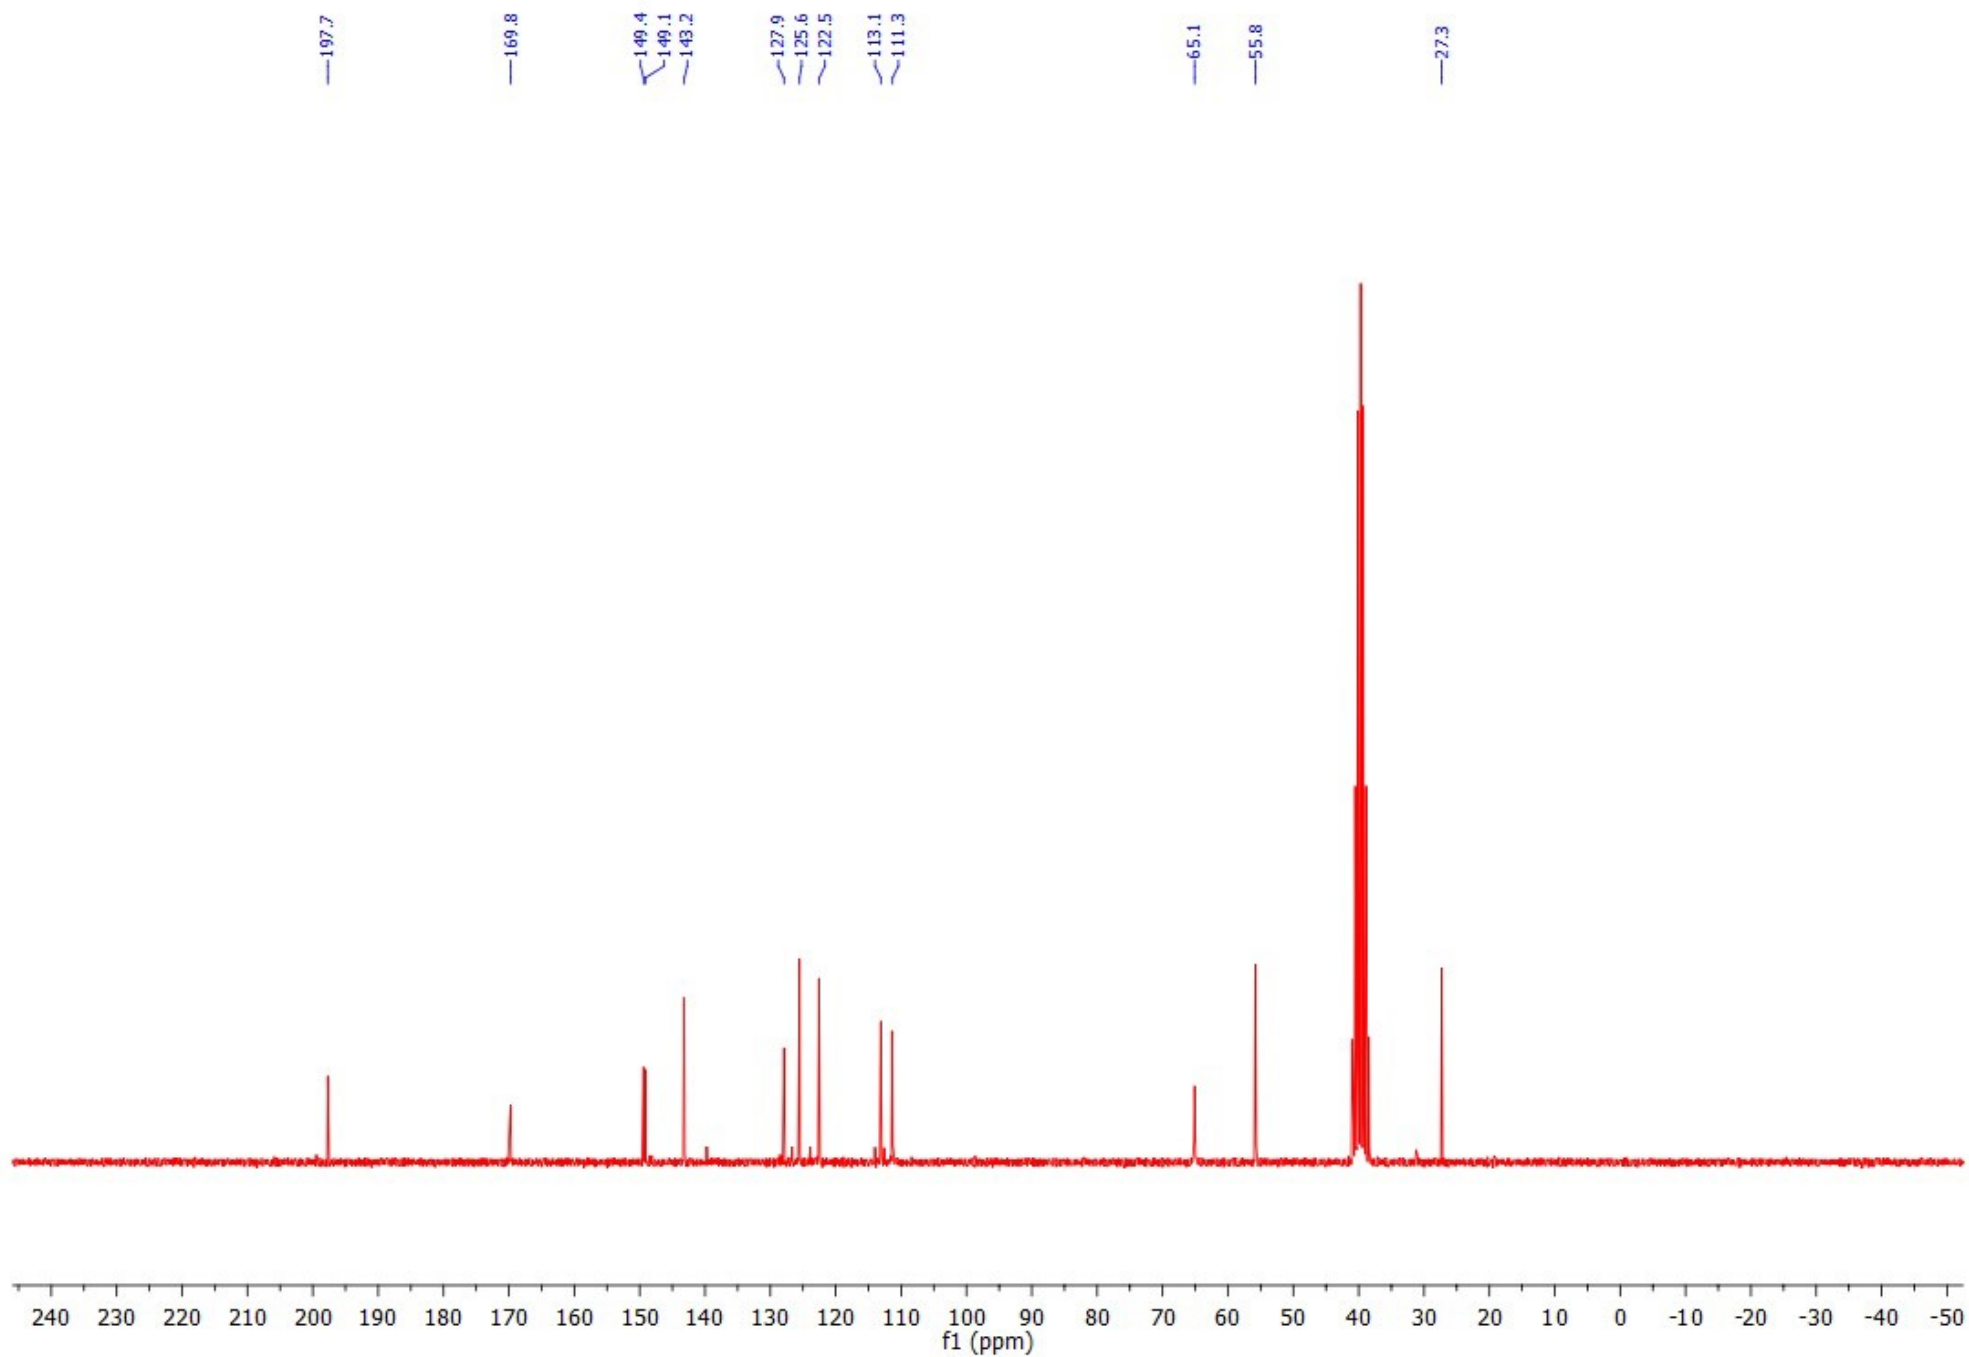

Supplement: d4ra06529h1.pdf [file d4ra06529h1.pdf]
