# Supplementary material for: Four newly synthesized enones induce mitochondrial-mediated apoptosis and G2/M cell cycle arrest in colorectal and cervical cancer cells
Source: Royal Society of Chemistry journal article supplement (doi:10.1039/d4ra06529h), 2024-01-01
Supplement: d4ra06529h9.pdf [file d4ra06529h9.pdf]

## RSC Advances

Electronic Supplementary Information associated with the paper

### **Four newly synthesized Enones induce mitochondrial-mediated apoptosis and G2/M cell cycle arrest in colorectal and cervical cancer cells.**

**Marija Bulić<sup>a</sup>, Ivana Nikolić<sup>b, c</sup>, Marina Mitrović<sup>b</sup>, Jovana Muškinja<sup>d</sup>, Tamara Todorović<sup>d</sup>  
and Marija Anđelković<sup>b, c\*</sup>**

✉ Marija Anđelković  
[marijabcd@gmail.com](mailto:marijabcd@gmail.com)

<sup>a</sup>*University clinical Centre of Serbia, Centre of medical biochemistry, Belgrade, Serbia,  
Pasterova 2, 11000 Belgrade, Serbia*

<sup>b</sup>*University of Kragujevac, Serbia, Faculty of Medical Sciences, Department of Biochemistry,  
Svetozara Markovića 69, 34000 Kragujevac*

<sup>c</sup>*Centre for Research on Harmful Effects of Biological and Chemical Hazards, Kragujevac,  
Serbia*

<sup>d</sup>*University of Kragujevac, Institute for Information Technologies, Department of Science,  
Jovana Cvijica bb, 34000 Kragujevac, Serbia*

**(E)-2-(2-methoxy-4-(3-oxobut-1-en-1-yl)phenoxy)acetic acid, E1**

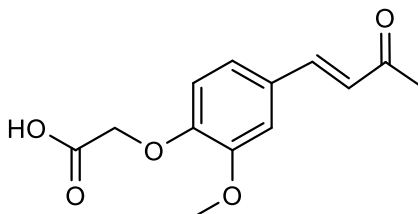

Yield: 85.2%; m.p. 143-144°C; IR (KBr): 3469, 2920, 1715, 1626, 1594, 1509, 1417, 1227, 1134, 1026, 972, 804  $\text{cm}^{-1}$ ;  $^1\text{H}$ NMR (200 MHz, DMSO- $d_6$ ): 2.31 (s, 3H,  $\text{CH}_3\text{CO}$ ), 3.83 (s, 3H,  $\text{OCH}_3$ ), 4.74 (s, 2H,  $\text{OCH}_2$ ), 6.74 (d, 1H,  $J=16.4$  Hz, CH), 6.89 (d, 1H,  $J=8.4$  Hz, Ar-H), 7.22 (dd, 1H,  $J=8.4, 2.0$  Hz, Ar-H), 7.35 (d, 1H,  $J=1.6$  Hz, Ar-H), 7.55 (d, 1H,  $J=16.4$  Hz, CH), 13.10 (br. s, 1H, COOH);  $^{13}\text{C}$ NMR (50 MHz, DMSO- $d_6$ ): 27.3, 55.8, 65.1, 111.3, 113.1, 122.5, 125.6, 127.9, 143.2, 149.1, 149.4, 169.8, 197.7 (CO).

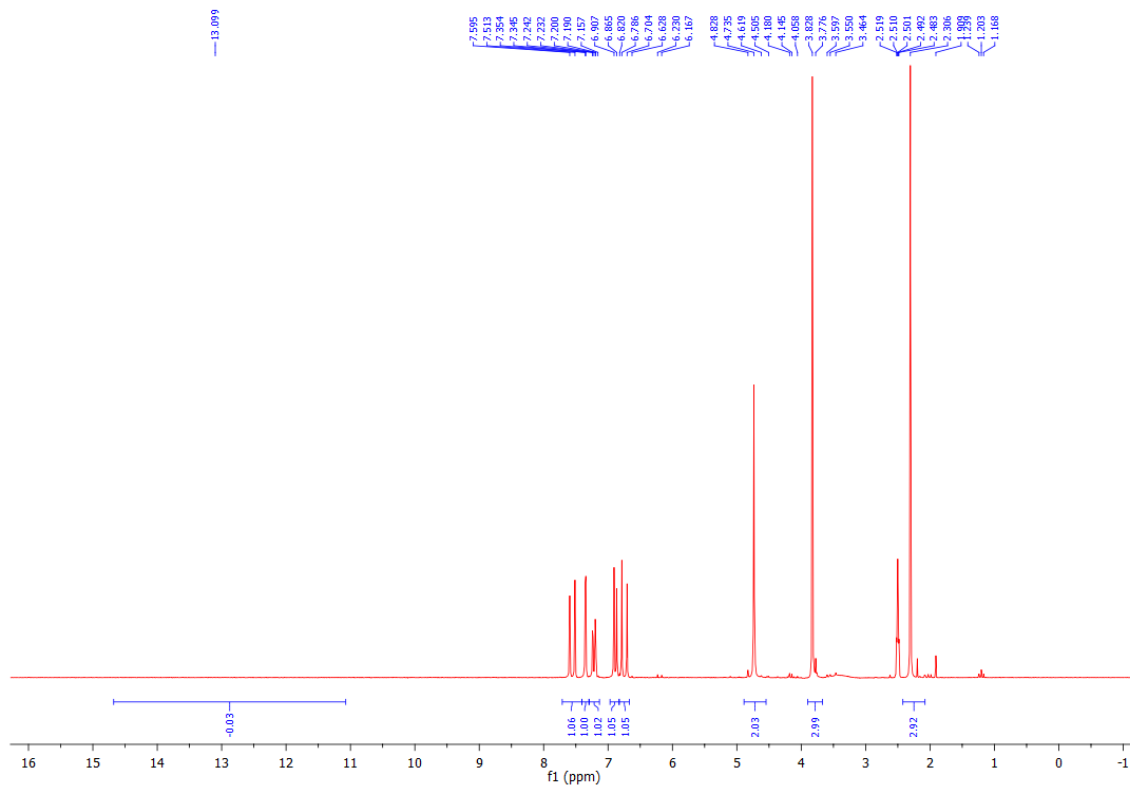

<sup>1</sup>H NMR spectrum of compound **E1**

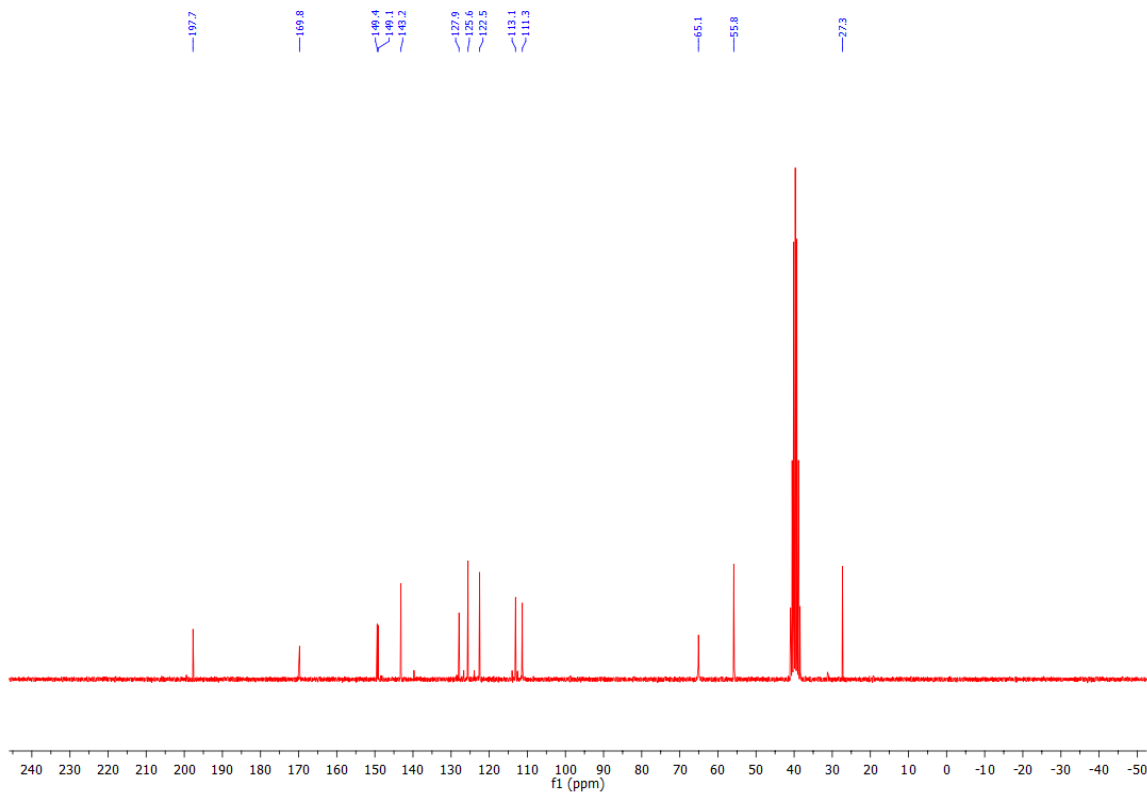

<sup>13</sup>C NMR spectrum of compound **E1**

**(E)-2-(2-methoxy-4-(4-methyl-3-oxopent-1-en-1-yl)phenoxy)acetic acid, E2**

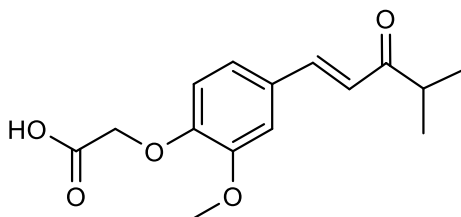

Yield: 62.7%; m.p. 115-116°C; IR (KBr): 3508, 2911, 1755, 1575, 1509, 1423, 1270, 1207, 1141, 1012, 977, 795  $\text{cm}^{-1}$ ;  $^1\text{H}$ NMR (200 MHz, DMSO- $\text{d}_6$ ): 1.07 (*d*, 6H,  $J=6.8$  Hz, 2 $\text{CH}_3$ ), 2.91-3.05 (*m*, 1H,  $\text{CH}(\text{CH}_3)_2$ ), 3.83 (*s*, 3H,  $\text{OCH}_3$ ), 4.73 (*s*, 2H,  $\text{OCH}_2$ ), 6.86-6.98 (*m*, 1H, Ar-H), 6.94 (*d*, 1H,  $J=16.0$  Hz, CH), 7.23 (*dd*, 1H,  $J=8.4, 1.8$  Hz, Ar-H), 7.39 (*d*, 1H,  $J=1.8$  Hz, Ar-H), 7.54 (*d*, 1H,  $J=16.0$  Hz, CH), 13.09 (*br. s*, 1H, COOH);  $^{13}\text{C}$ NMR (50 MHz, DMSO- $\text{d}_6$ ): 18.6, 38.2, 55.9, 65, 111.3, 113, 122.7, 123.1, 128, 141.9, 149.3, 149.4, 169.8, 202.9 (CO).

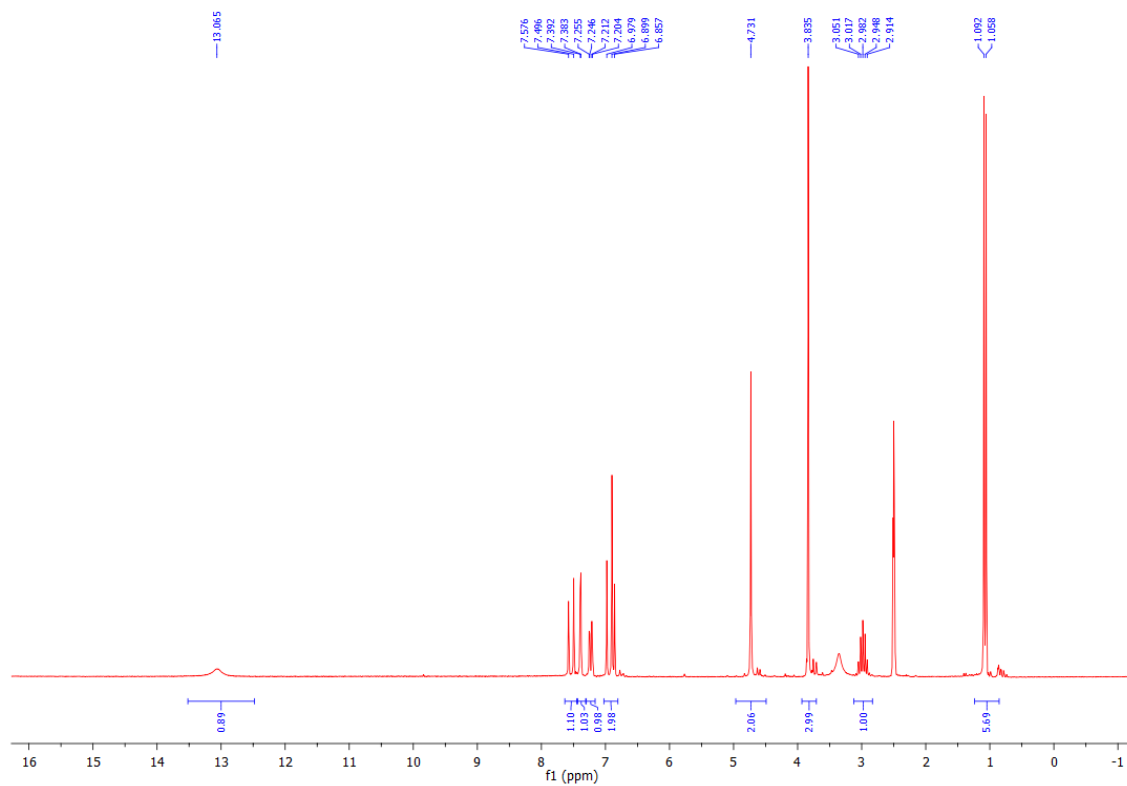

$^1\text{H}$  NMR spectrum of compound **E2**

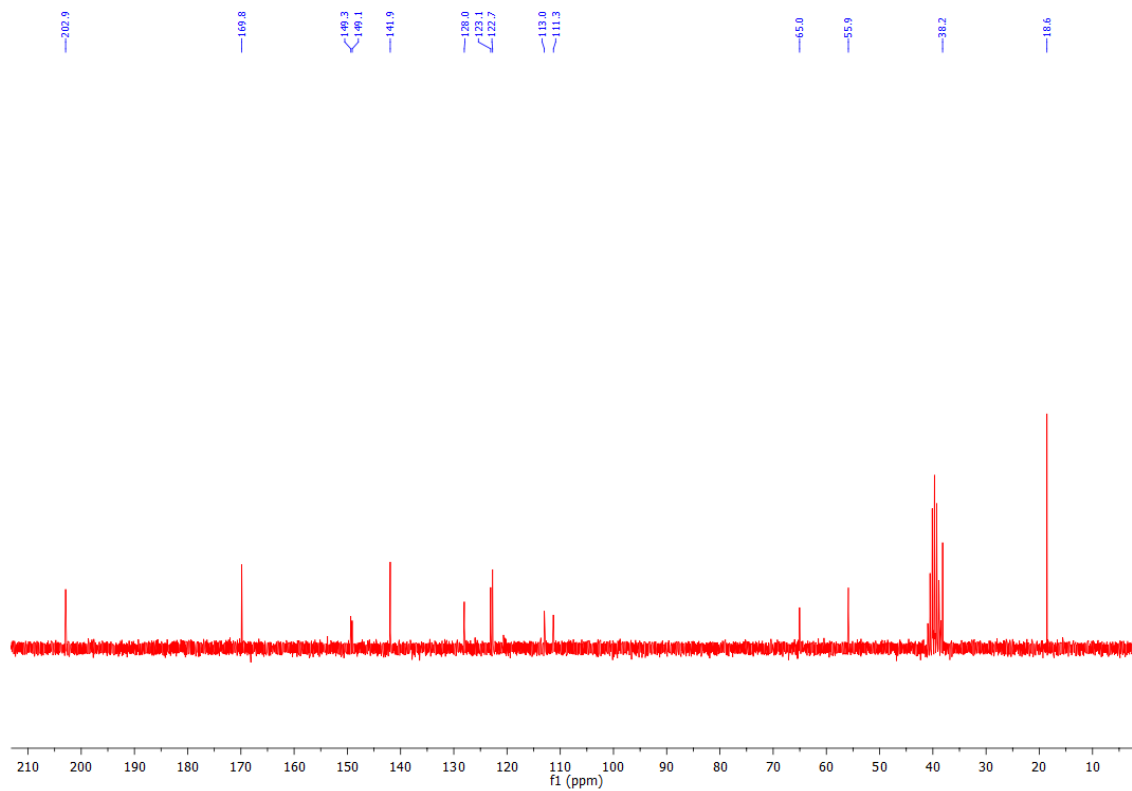

$^{13}\text{C}$  NMR spectrum of compound **E2**

**(E)-2-(2-methoxy-4-(5-methyl-3-oxohex-1-en-1-yl)phenoxy)acetic acid, E3**

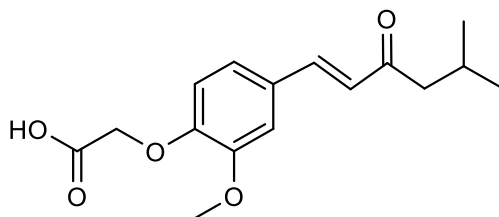

Yield: 93.2%; m.p. 117-118°C; IR (KBr): 3494, 2957, 1748, 1578, 1509, 1421, 1267, 1208, 1137, 1030, 819, 793  $\text{cm}^{-1}$ ;  $^1\text{H}$ NMR (200 MHz, DMSO- $\text{d}_6$ ): 0.91 (*d*, 6H,  $J=6.6$  Hz, 2 $\text{CH}_3$ ), 2.05-2.18 (*m*, 1H,  $\text{CH}(\text{CH}_3)_2$ ), 2.53 (*d*, 2H,  $J=7.0$  Hz,  $\text{CH}_2\text{CH}(\text{CH}_3)_2$ ), 3.83 (*s*, 3H,  $\text{OCH}_3$ ), 4.73 (*s*, 2H,  $\text{OCH}_2$ ), 6.81 (*d*, 1H,  $J=16.4$  Hz, CH), 6.90 (*s*, 1H, Ar-H), 7.22 (*dd*, 1H,  $J=8.4, 1.8$  Hz, Ar-H), 7.36 (*d*, 1H,  $J=1.8$  Hz, Ar-H), 7.54 (*d*, 1H,  $J=16.2$  Hz, CH), 13.06 (*br. s*, 1H, COOH);  $^{13}\text{C}$ NMR (50 MHz, DMSO- $\text{d}_6$ ): 22.6, 24.8, 48.9, 55.8, 65, 111.3, 113, 122.6, 125.1, 128, 142.2, 149.1, 149.4, 169.8, 199.5 (CO).

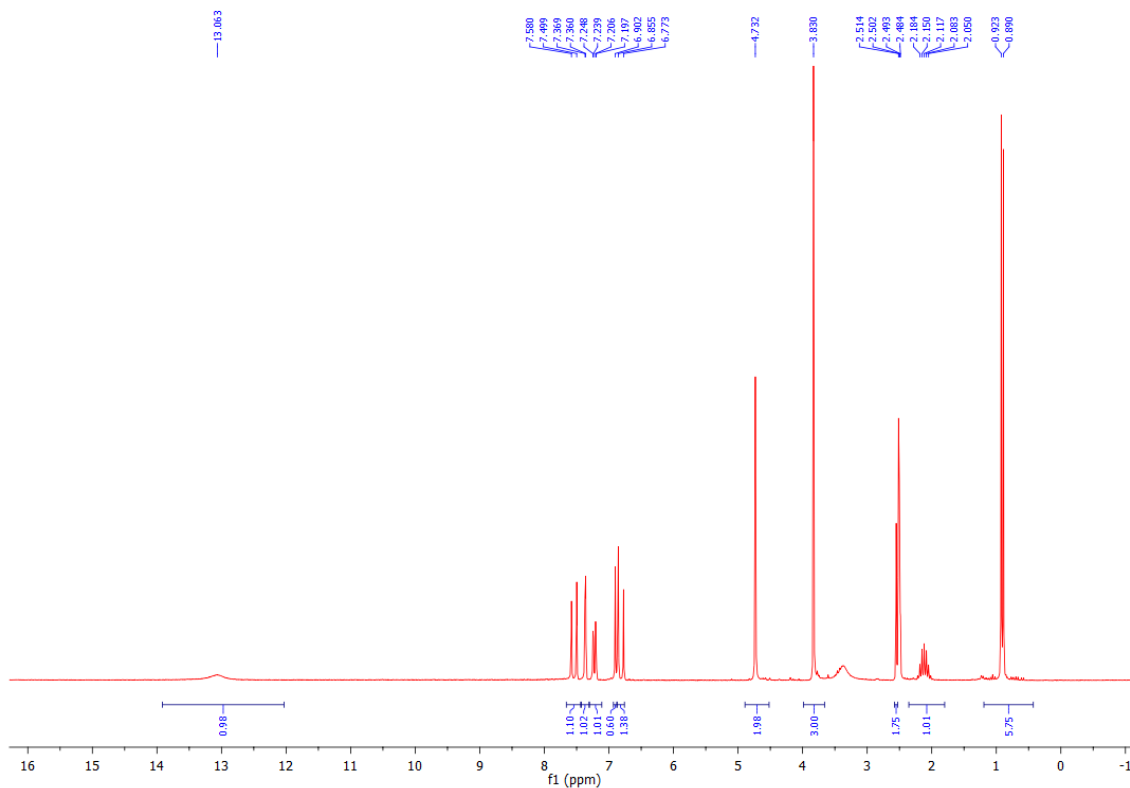

<sup>1</sup>H NMR spectrum of compound **E3**

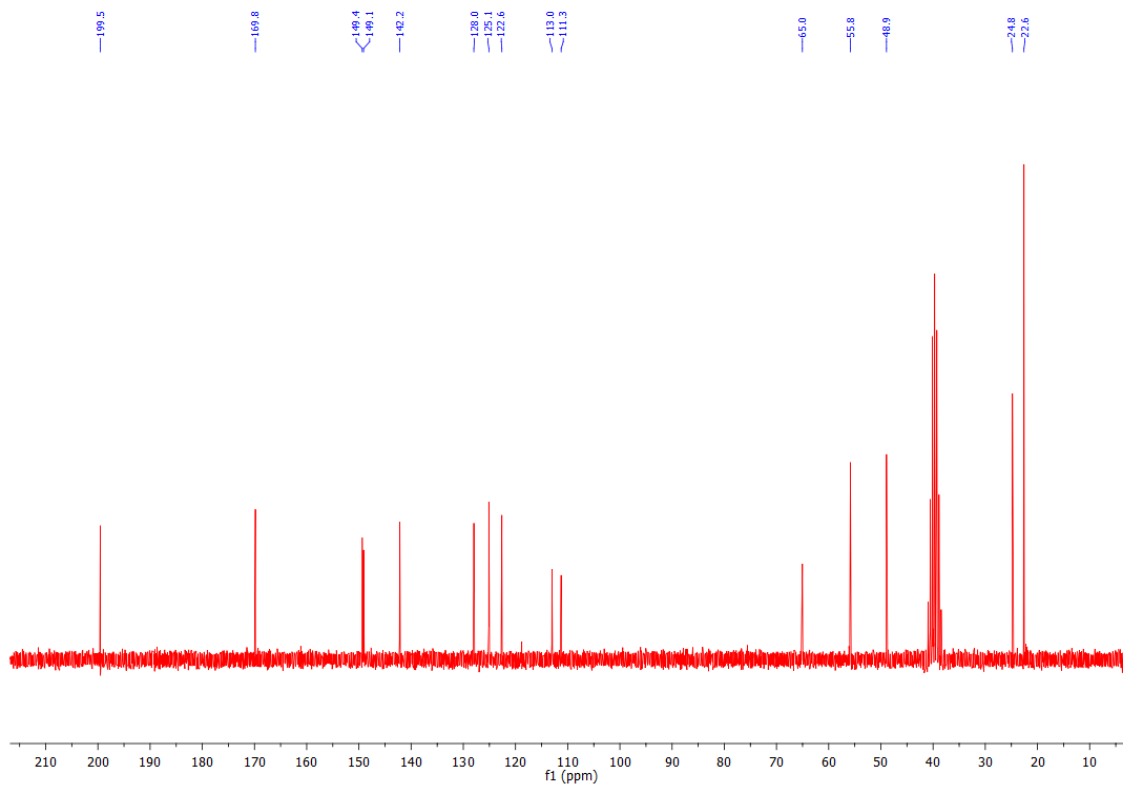

<sup>13</sup>C NMR spectrum of compound **E3**

**(E)-2-(4-(3-cyclopropyl-3-oxoprop-1-en-1-yl)-2-methoxyphenoxy)acetic acid, E4**

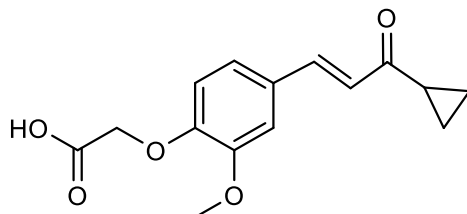

Yield: 90.8%; m.p. 89-90°C; IR (KBr): 3416, 1722, 1633, 1510, 1426, 1393, 1224, 1144, 1077, 989, 787  $\text{cm}^{-1}$ ;  $^1\text{H}$ NMR (200 MHz, DMSO- $d_6$ ): 0.93 (*d*, 4H,  $J=6.2$  Hz, 2 $\text{CH}_2$ ), 2.36-2.45 (*m*, 1H, CH), 3.84 (*s*, 3H,  $\text{OCH}_3$ ), 4.74 (*s*, 2H,  $\text{OCH}_2$ ), 6.89 (*d*, 1H,  $J=8.4$  Hz, Ar-H), 6.98 (*d*, 1H,  $J=16.0$  Hz, CH), 7.24 (*dd*, 1H,  $J=8.4, 1.6$  Hz, Ar-H), 7.39 (*d*, 1H,  $J=1.8$  Hz, Ar-H), 7.62 (*d*, 1H,  $J=16.2$  Hz, CH), 13.07 (*br. s*, 1H, COOH);  $^{13}\text{C}$ NMR (50 MHz, DMSO- $d_6$ ): 10.6, 19, 55.9, 65.1, 111.3, 113, 122.8, 124.8, 128, 142, 149.2, 149.4, 169.9, 199.1 (CO).



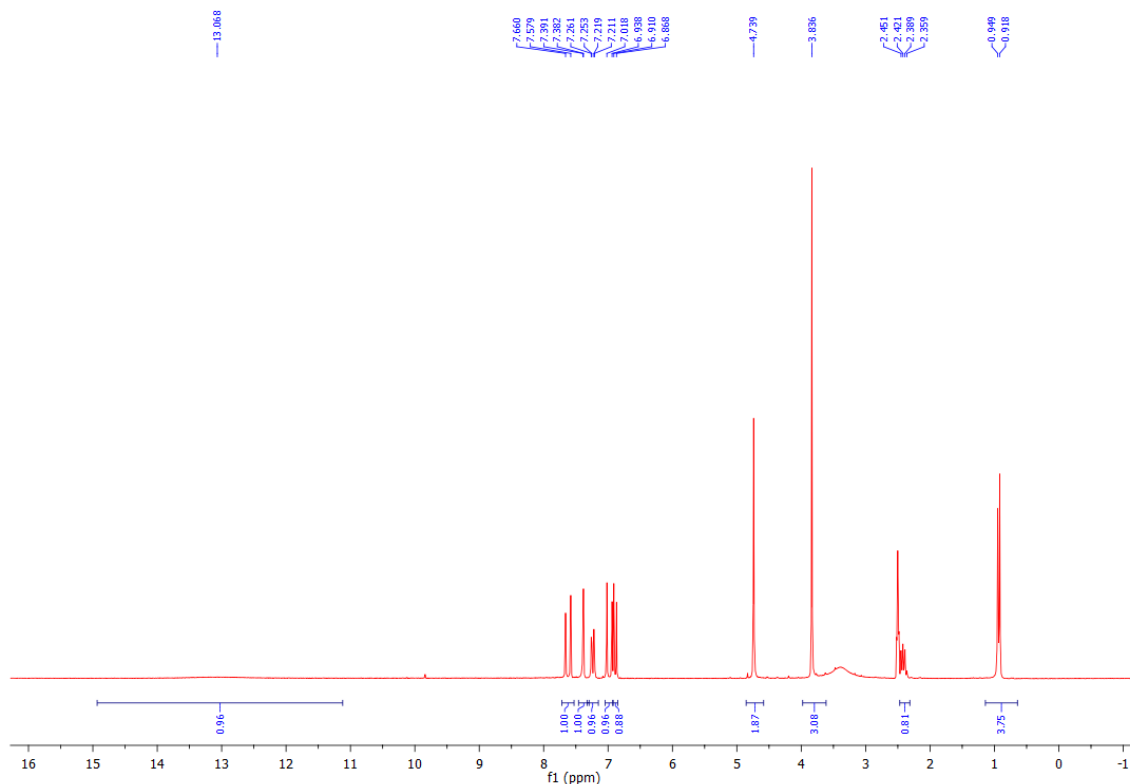

$^{1}\text{H}$  NMR spectrum of compound **E4**

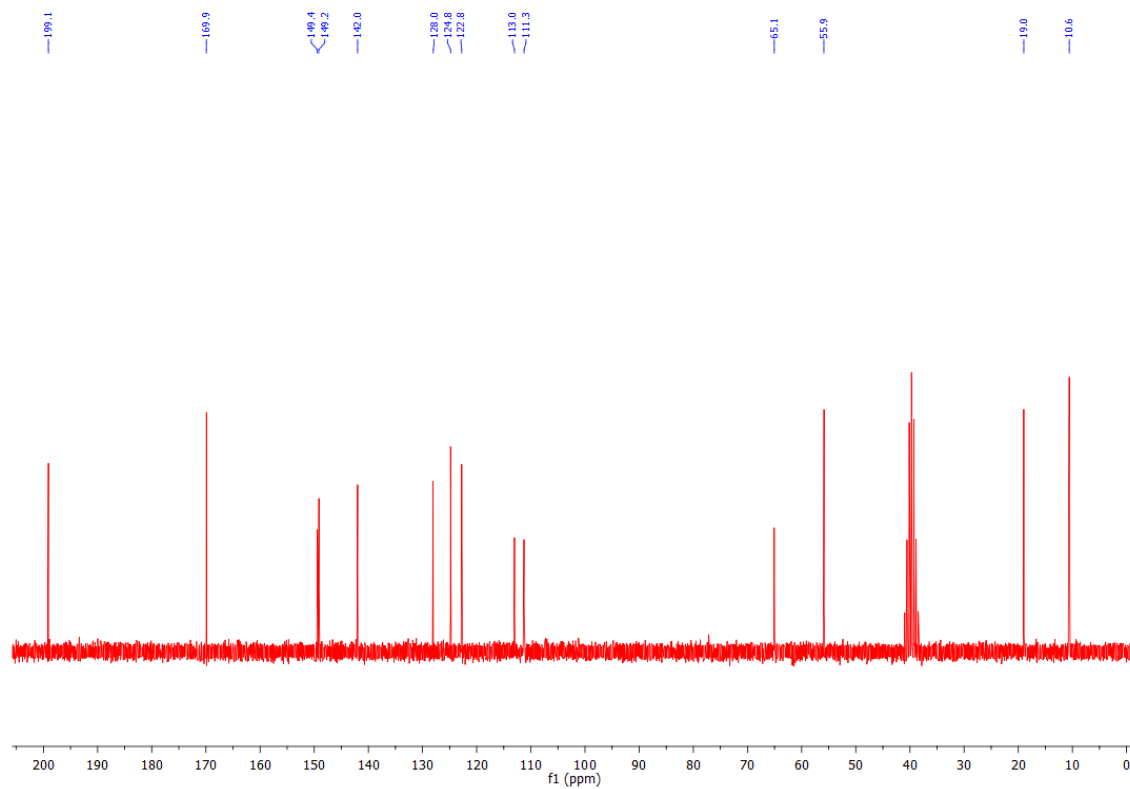

$^{13}\text{C}$  NMR spectrum of compound **E4**
